# Supplementary material
Source: Springer Nature journal article supplement (https://www.springermedizin.de/resource/supplementary/13058_2013_3419_MOESM5_ESM.pdf/9704106)

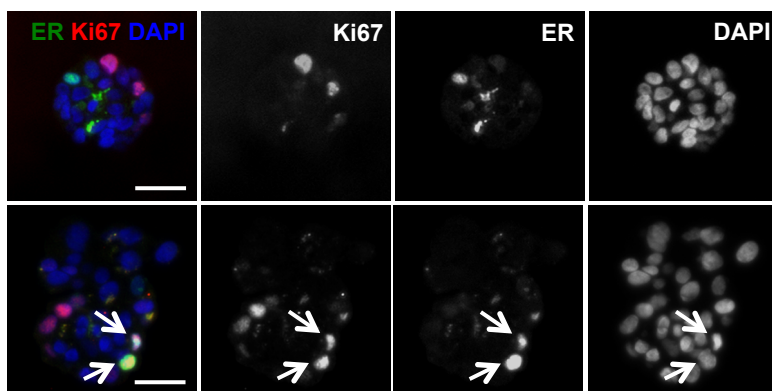

Supplement: MOESM5 [file 9704106]
